# Supplementary material
Source: PubMed Central journal article supplement (PMC7534410)
Supplement: NIHMS1625092-supplement-1.pdf [file NIHMS1625092-supplement-1.pdf]

## Supplementary Figures

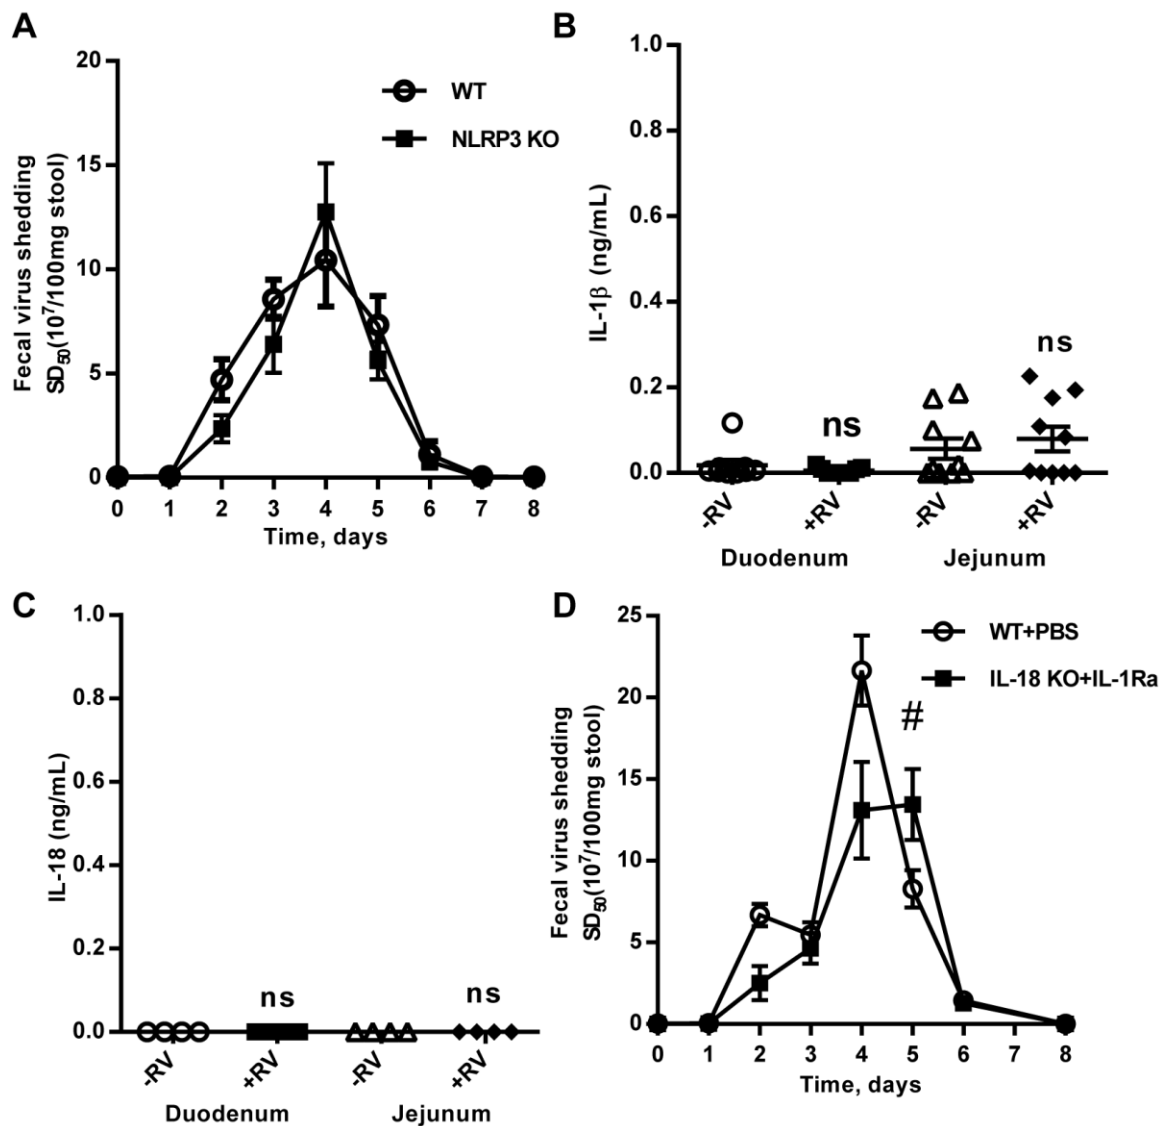

**Supplementary Figure 1.** IL-1 or -18 alone is not important for control of primary RV infection. (A) Adult mice were inoculated with RV as described, and small intestines were harvested and cultured. After 24 h of *ex-vivo* culture, supernatants were probed for the presence of IL-1 and (B) -18 by ELISA. (C) IL-18 KO mice were treated with an IL-1 receptor antagonist and inoculated with RV. Feces were collected and probed for RV antigen by ELISA. IL-1 and -18 expression ELISAs, (A) - (B), respectively, were performed on the same culture supernatants and are representative of 1 experiment. Each point represents an individual *ex-vivo* culture supernatant, horizontal lines denote mean, error bars represent SEM, n = 5. Results in (C) are representative of another independent experiment where each point denotes mean, error bars represent SEM, n = 5.

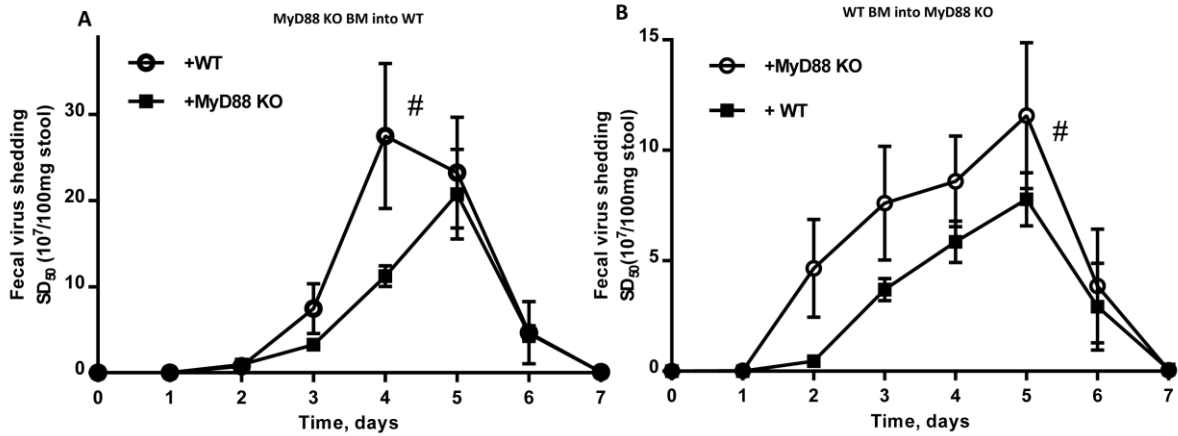

**Supplementary Figure 2.** MyD88 signaling in either radio-sensitive/bone marrow-derived cells or radio-resistant cells contributes to control of RV infection. (A) WT mice reconstituted with MyD88 KO bone marrow were inoculated with RV, and feces were probed for RV antigen by ELISA. (B) MyD88 KO mice reconstituted with WT bone marrow were inoculated with RV, and feces were analyzed as described in (A). Data in (A) and (B) are from individual experiments with points denoting means, error bars representing SEM, n = 4 - 5.

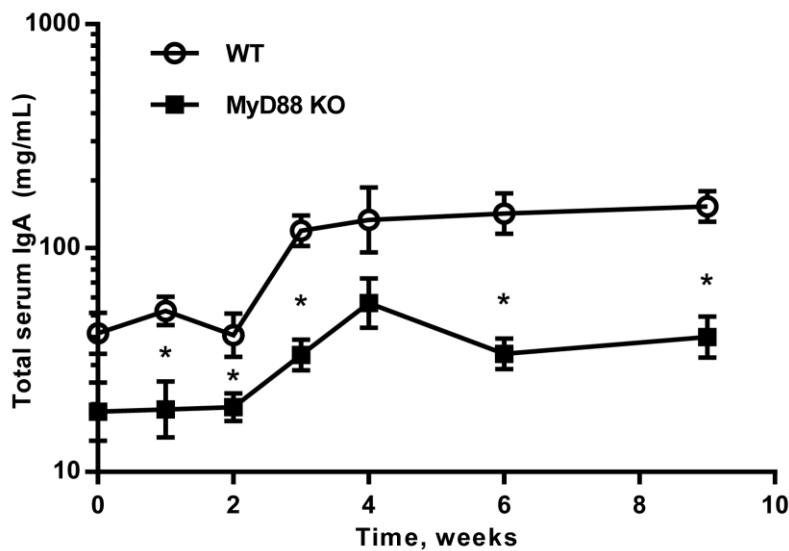

**Supplementary Figure 3.** MyD88 induces non-specific (total) IgA production in the serum. MyD88 KO and control mice were inoculated with RV and bled until 9 wk PI. Serum was probed for non-specific (total) IgA production by ELISA. Results are from an individual experiment where each point denotes mean, error bars represent SEM, n = 5.

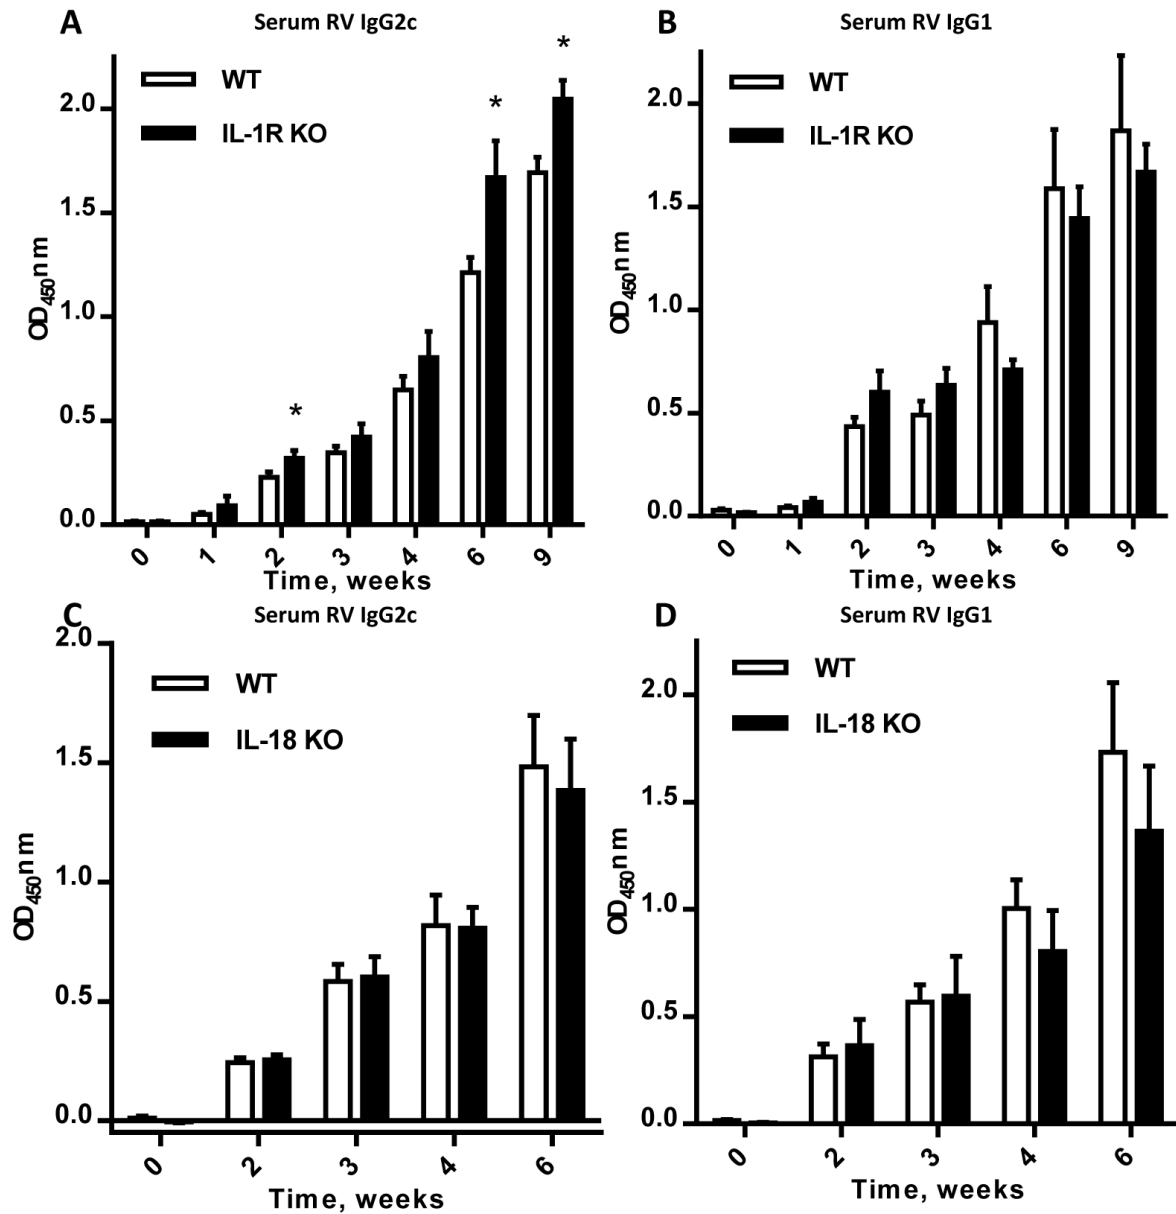

**Supplementary Figure 4.** IgG sub-type switch is not dependent on either IL-1 or -18 signaling. (A) IL-1R KO mice were inoculated with RV and bled until 9 wk PI. Serum was probed for RV-specific IgG2c or (B) IgG1. (C) IL-18 KO mice were inoculated with RV and bled until 9 wk PI. Serum was probed for RV-specific IgG2c or (D) IgG1. Data in (A) and (B) are representative results of 2 independent experiments, and data in (C) and (D) are from an independent experiment. (A) - (D) each bar denotes mean, error bars represent SEM, n = 5.

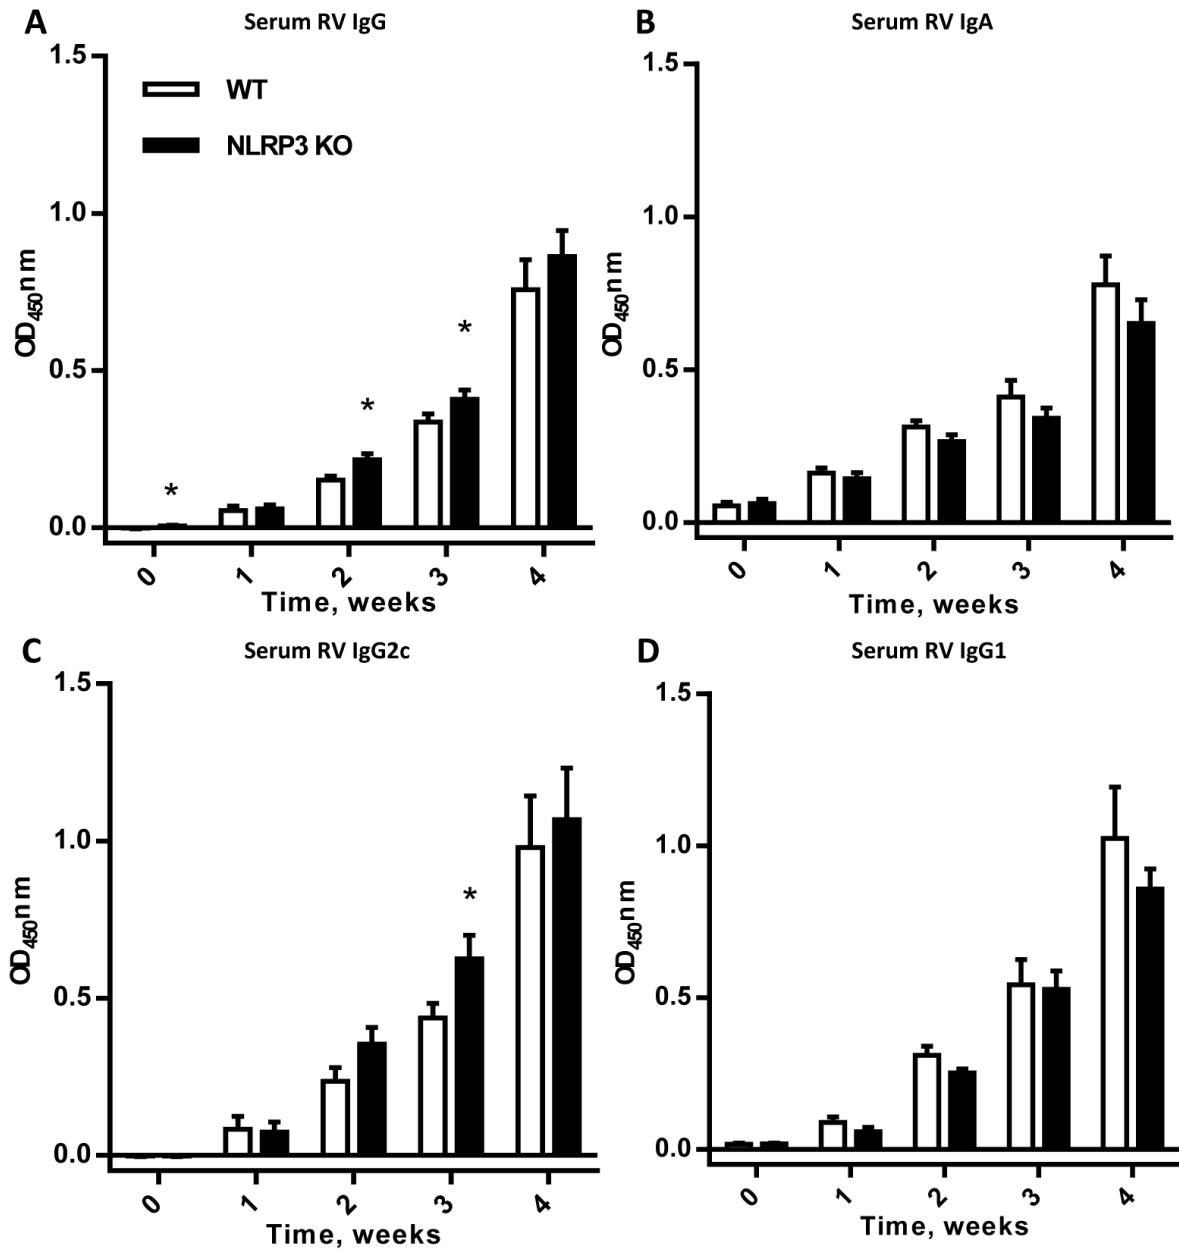

**Supplementary Figure 5.** IgG sub-type switch is not dependent on the NLRP3 inflammasome. (A) NLRP3 KO mice were inoculated with RV and feces were probed for RV antigen by ELISA. Serum was probed for RV-specific (B) IgG, (C) IgA, (D) IgG2c, and (E) IgG1. Data in (A) through (E) are results of 1 independent experiment, with each bar denoting mean, error bars representing SEM, n = 5.
